# Supplementary material
Source: Springer Nature journal article supplement (https://www.springermedizin.de/resource/supplementary/12943_2006_164_MOESM6_ESM.pdf/9553582)

% of 60 minute group

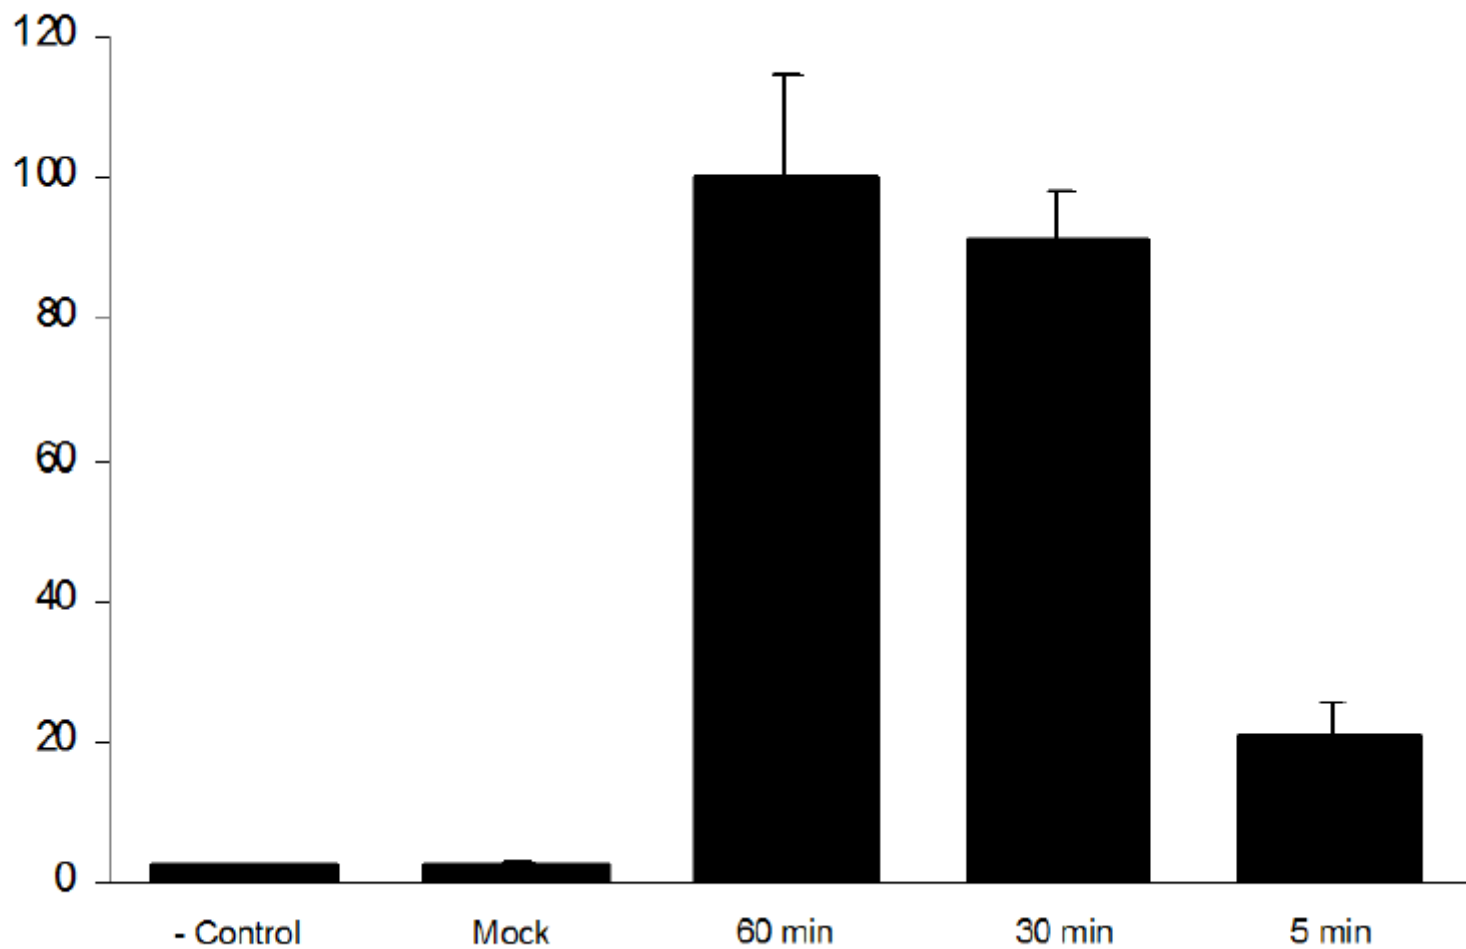

Supplement: MOESM6 [file 9553582]
